# Supplementary material
Source: Springer Nature journal article supplement (https://www.springermedizin.de/resource/supplementary/12936_2014_3277_MOESM2_ESM.pdf/9545520)
Supplement: MOESM2 [file 9545520]

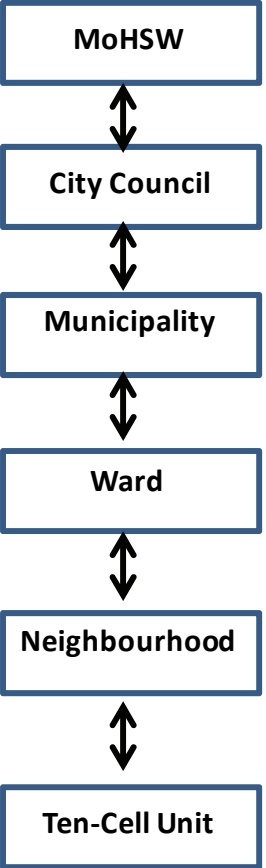

**FINE SPATIAL SCALES AND SMALL HUMAN COMMUNITIES**  
**DECENTRALIZED MANAGEMENT**  
**INDIVIDUAL AND COMMUNITY PARTICIPATION**  
**GRASS ROOTS, LOCAL GOVERNMENT**  
**FEEDBACK CYCLES OF DAYS, WEEKS OR MONTHS**  
**INTERVENTION DELIVERY AND MONITORING**  
**INFORMAL, HANDS-ON LEARNING**

**LARGE SPATIAL SCALES AND HUMAN POPULATIONS**  
**CENTRAL MANAGEMENT**  
**INSTITUTIONAL PARTICIPATION**  
**NATIONAL AND REGIONAL GOVERNMENT**  
**EVALUATION AND RESEARCH**  
**FEEDBACK CYCLES OF MONTHS OR YEARS**  
**FORMAL/SCIENTIFIC INVESTIGATION**
